# Supplementary material for: Deep water hydrodynamic observations around a Cold-Water Coral habitat in a submarine canyon in the Eastern Ligurian Sea (Mediterranean Sea)
Source: Copernicus journal article supplement (doi:10.5194/essd-2022-466), 2023-01-05
Supplement: Supplementary file [file essd-2022-466-AC1-supplement.pdf]

## Author's reply to Comment on [essd-2022-466](#) by Dr. Paola Picco

The authors present a long-term dataset of hydrological and dynamical observations in the Levante Canyon located in the Eastern Ligurian Sea. These data are particularly precious and relevant as they are collected in a deep canyon, which hosts important and rare marine species. Moreover, these observations can well support sound investigations about deep canyon dynamics. Nevertheless, as the main objective of the paper is the dataset presentation, more information and discussion about meta-data and quality check results must be provided to the reader.

AR: Thank you for taking the time to review our submission and provide us with constructive feedback. Please see below how we have implemented and addressed your suggestions. Specified line numbers refer to the original document.

a) Meta information also including sampling interval of each sensor, water column covered by the ADCP, mooring deployment and maintenance ... should be resumed in a table;

AR: Thank you for this comment. We agree that a resume table is useful to increase the readability of our work. In this regard, a new table (Table 1) and a new paragraph in Section 2.1 has been added to the manuscript, with all the needed meta information.

No information can be found about the sedimentary trap;

AR: Information about the sedimentary trap has been included in Table 1.

Time series of ADCP backscatter are also relevant data to be included in the data set;

AR: Agreed. Time series of ADCP echo intensities are relevant data and have been included in the submitted data set (<https://doi.org/10.17882/92236>), stored in the NetCDF files. This info has also been added to the manuscript (Lines 130-131).

b) Fig.3 provide a 2D plot (temporal evolution of profiles) of T and S. The distance between the layers is too high to allow for a reliable interpolation, thus introducing misleading results. Temperature and Salinity are well represented in fig.2 and fig.4. It is a nice representation but I would suggest to eliminate it.

AR: Figure 3 was inserted to provide a synthetic view about the dynamics across the water column during the time. The only real interpolation through DIVA was related to temperature measurements recorded at 325 and 350 m by ADCP and CTD respectively. Nevertheless, a revised version of the manuscript without Figure 3 has been provided to avoid confusion.

c) Even if data at 88 m depth still present a clear seasonal cycle and inter-annual variability, surface signals are strongly attenuated and filtered out when reaching this depth. Moreover, different dynamic can be found between the surface and this layer, so I would suggest not to assume that they are representative of the upper thermocline, modifying the sentence (paragraph line 203).

AR: Agreed. The paragraph has been reviewed as suggested.

d) Salinity data at 350 m depth seem unreasonable for the investigated area and not consistent with the values at the other depths. To this end, I suggest to plot computed density in order to check for the stability of water column or to go back to fig.5 which indicates the LIW denser than waters at higher depths, which is not possible. Even this problem is addressed at the end of ch.4, it still requires a deeper discussion. As these data were not checked against laboratory salinometer analysis of in situ samples nor compared with CTD profiles and do not seem to satisfy vertical stability, it should be better not to make them available to the scientific community.

AR: In Figure 5 there was an error related to reported density values for all the three water levels. The following Figure, showing density time-series for the three levels, shows that the vertical stability of the water column is indeed satisfied.

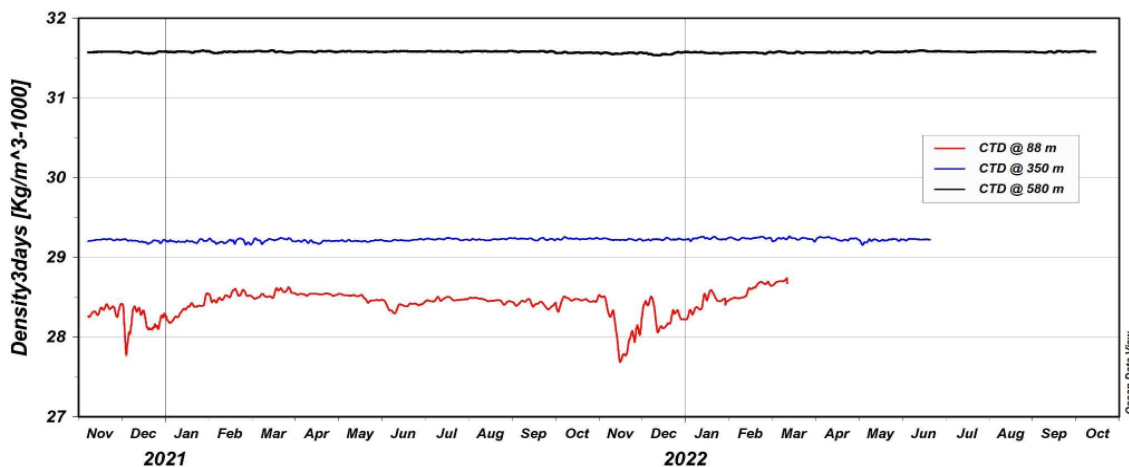

Nevertheless, as density and salinity values recorded by the CTD at 350 m depth are high for the investigated area we decide to flag them as potentially correctable bad data in the re-submitted data set (<https://doi.org/10.17882/92236>). In order to fix this, future measurements were already planned to be checked against a laboratory salinometer and compared with concomitant CTD profiles.

e) ADCPs ancillary data provide relevant information about the collected data quality; pressure sensors allow to check for the vertical position of the entire mooring line: add some comments and show something (e.g. show an average profile of the echo intensity to check for the signal attenuation, plot time series of pressure or pitch roll tilt)

AR: Agreed. As a fact, the QC procedure was done taking this into account. It's not only the pressure sensor, it's a series of controls and cross-validations that are presented within the manuscript. As regards the RDI, the manuscript has been revised providing a pitch/roll/tilt figure. For the Nortek the QC procedure related to data with tilt effect, has been performed throughout the Nortek Surge post-processing software.

Did the other parts of the mooring line affect the ADCP measurements?

AR: The mooring layout has been designed to avoid interference between sensors and to minimize disturbance caused by the mooring itself. Furthermore, in the case of ADCP measurements affected by the mooring inclination, the measurements have been flagged by the appropriate flags as results of QC procedure.

How is the correlation between each bin time series? Are data from the two ADCPs consistent?

AR: The RDI NetCDF files contain the pulse-to-pulse correlation in a ping for each depth cell. As a decrease in the correlation is a decrease in data accuracy, measurements with low correlation cannot pass the quality control and are flagged with a number different than 1. The threshold of the minimum accepted correlation value is depending on the ADCP model and the transmitted frequency. RDI, for example, recommends a threshold value of 64 for the Workhorse Long Ranger 75 kHz model and 120 for the Ocean Observer 38 kHz. In our case, a threshold of 110 was used, as suggested by the manufacturer. The NORTEK NetCDF does not contain the correlation values as the quality control was done by the use of the NORTEK-provided software SURGE. A complete correlation analysis is out of the scope of the present preliminary publication. As soon as additional long term time-series will be available for the site, we will certainly add more results for this topic in a future publication intended for a dedicated oceanographic Journal.

Nothing is mentioned about vertical currents, why?

AR: Vertical currents have been disregarded because their magnitudes are typically of the same order of accuracy of both the ADCPs. Time series of RDI ADCP vertical velocities have been included in the submitted data set (<https://doi.org/10.17882/92236>), stored in the NetCDF files.

A Northward prevailing current component is evidenced by the reported scatter plots close to the bottom. Add a comment about the role of the topography of the deep canyon in modifying the current direction close to the bottom.

AR: Agreed. A comment in this sense was already reported at L265-266, and a new paragraph has been added thereafter as suggested.

The sampling time resolution of ADCPs (2 h and 1 hours) seems quite low. Two-hours resolution is unable not only to solve the main processes of interest occurring in a canyon (vertical dynamics, internal waves, density currents) but even the analysis of the general circulation features of the region such as tidal and inertial currents cannot be properly addressed. I understand the need to reduce the power consumption to guarantee a longer temporal coverage of the time series, but the objectives of the monitoring and the consequent sampling strategy defined to achieve these objectives must be clear indicated and discussed in the paper.

AR: Unfortunately, there was a typing error: the sampling time resolution is 1h for both the RDI and the Nortek ADCPs. The paper has been revised accordingly (Line 121). This information has been also added in Table 1. This resolution is considered acceptable to solve the inertial signal at our latitudes where with measurements every 1h, we would have about 20 points for each cycle. During this first period the priority was to understand the long-term hydrological dynamics along the water column in the area and hence to reduce the power consumption to guarantee a longer temporal coverage of the time series. Here the main goal of the paper is the presentation of the long-term dataset in such a peculiar environment, which hosts vulnerable marine species such as the CWC that we identified in previous investigations.
